# Supplementary material for: A density functional theory study of aldehydes and their atmospheric products participating in nucleation
Source: Royal Society of Chemistry journal article supplement (doi:10.1039/c7cp06226e), 2017-12-06
Supplement: c7cp06226e1.pdf [file c7cp06226e1.pdf]

**Figure S1** Lowest Gibbs free energy structures of molecule calculated at the M06-2X/6-31+G(d,p) level.

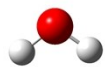

H<sub>2</sub>O

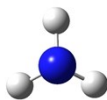

NH<sub>3</sub>

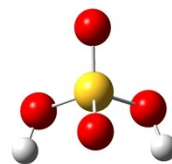

SA

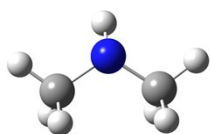

DMA

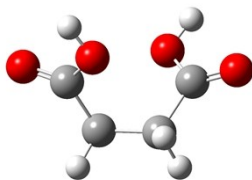

SUA

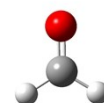

HCHO

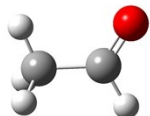

CH<sub>3</sub>CHO

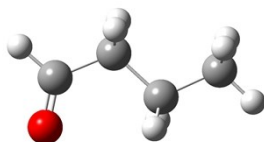

CH<sub>3</sub>(CH<sub>2</sub>)<sub>2</sub>CHO

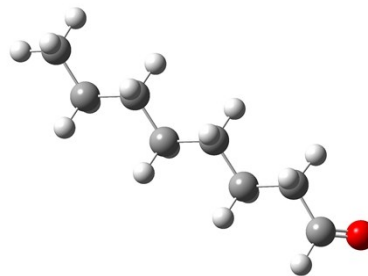

CH<sub>3</sub>(CH<sub>2</sub>)<sub>6</sub>CHO

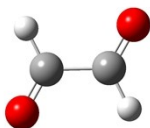

(CHO)<sub>2</sub>

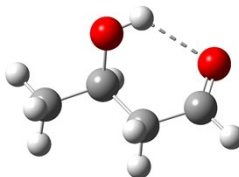

P1

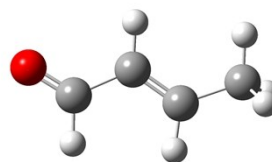

P2

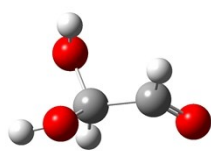

P3

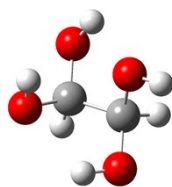

P4

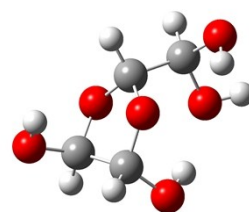

P5

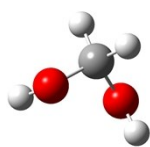

P6

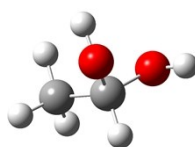

P7

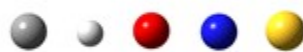

C H O N S

**Figure S1**

**Table S1** Gibbs free energy ( $G$ ) of clusters calculated at M06-2X/6-311+G(3df,3pd) level.

| clusters                                               | $G(\text{Hartree})$ |
|--------------------------------------------------------|---------------------|
| SA+NH <sub>3</sub>                                     | -756.8202           |
| SA+SUA                                                 | -1157.1874          |
| SA+DMA                                                 | -835.3671           |
| SA+SA                                                  | -1400.5627          |
| SA+HCHO                                                | -814.7673           |
| SA+CH <sub>3</sub> CHO                                 | -854.0640           |
| SA+CH <sub>3</sub> (CH <sub>2</sub> ) <sub>2</sub> CHO | -932.6245           |
| SA+CH <sub>3</sub> (CH <sub>2</sub> ) <sub>6</sub> CHO | -1089.7440          |
| SA+(CHO) <sub>2</sub>                                  | -928.0774           |
| SA+P1                                                  | -1007.8519          |
| SA+P2                                                  | -931.4272           |
| 2SA+P1                                                 | -1708.1454          |
| SA+2P1                                                 | -1315.4288          |
| SA+P1+DMA                                              | -1142.9487          |
| P1+H <sub>2</sub> O                                    | -383.9892           |
| P1+DMA                                                 | -442.6411           |
| P1+SUA                                                 | -764.4713           |
| 2P1                                                    | -615.1364           |
| SA+P3                                                  | -1004.5145          |
| SA+P4                                                  | -1080.9452          |
| SA+P5                                                  | -1308.7645          |
| SA+2P3                                                 | -1308.7507          |
| SA+3P3                                                 | -1612.9834          |
| 2SA+P3                                                 | -1704.7988          |
| 3SA+P3                                                 | -2405.0846          |
| SA+P6                                                  | -891.2000           |
| SA+P7                                                  | -930.4888           |

**Table S2** Gibbs free energy ( $G$ ) of molecules calculated at the M06-2X/6-311+G(3df,3pd) level.

| molecules                                           | $G$ (Hartree) |
|-----------------------------------------------------|---------------|
| H <sub>2</sub> O                                    | -76.4236      |
| NH <sub>3</sub>                                     | -56.5352      |
| SA                                                  | -700.2732     |
| DMA                                                 | -135.0728     |
| SUA                                                 | -456.8961     |
| HCHO                                                | -114.4901     |
| CH <sub>3</sub> CHO                                 | -153.7848     |
| CH <sub>3</sub> (CH <sub>2</sub> ) <sub>2</sub> CHO | -232.3448     |
| CH <sub>3</sub> (CH <sub>2</sub> ) <sub>6</sub> CHO | -389.4641     |
| (CHO) <sub>2</sub>                                  | -227.8030     |
| P1                                                  | -307.5703     |
| P2                                                  | -231.1465     |
| P3                                                  | -304.2281     |
| P4                                                  | -380.6606     |
| P5                                                  | -608.4796     |
| P6                                                  | -190.9174     |
| P7                                                  | -230.2065     |

### Cartesian coordinates of minimum structures

H<sub>2</sub>O

|   |             |             |            |
|---|-------------|-------------|------------|
| O | 0.00000000  | 0.11567100  | 0.00000000 |
| H | 0.76847700  | -0.46256100 | 0.00000000 |
| H | -0.76847700 | -0.46280400 | 0.00000000 |

NH<sub>3</sub>

|   |             |             |             |
|---|-------------|-------------|-------------|
| N | 0.00000100  | -0.00000700 | -0.10775400 |
| H | -0.13090000 | 0.93872200  | 0.25143300  |
| H | -0.74752700 | -0.58269300 | 0.25142600  |
| H | 0.87841700  | -0.35598200 | 0.25142100  |

H<sub>2</sub>SO<sub>4</sub> (SA)

|   |             |             |             |
|---|-------------|-------------|-------------|
| S | 0.00018200  | 0.09319300  | 0.12648200  |
| O | -0.00261700 | -0.79873200 | 1.26432100  |
| O | 0.00361500  | 1.51796100  | 0.22188400  |
| O | 1.24231200  | -0.30810300 | -0.80119700 |
| H | 1.56883800  | -1.18458600 | -0.54202700 |
| O | -1.24289000 | -0.30239500 | -0.80247400 |
| H | -1.57509900 | -1.17634700 | -0.54196200 |

CH<sub>3</sub>NHCH<sub>3</sub> (DMA)

|   |             |             |             |
|---|-------------|-------------|-------------|
| N | 0.02646700  | 0.58649700  | 0.00000000  |
| H | -0.77692800 | 1.20605400  | 0.00000000  |
| C | 0.02646700  | -0.22358200 | 1.20696300  |
| C | 0.02646700  | -0.22358200 | -1.20696300 |
| H | -0.02283500 | 0.42186100  | 2.08725200  |
| H | 0.96412500  | -0.78690700 | 1.25757900  |
| H | -0.80425800 | -0.94923100 | 1.25422700  |
| H | 0.96412500  | -0.78690700 | -1.25757900 |
| H | -0.02283500 | 0.42186100  | -2.08725200 |
| H | -0.80425800 | -0.94923100 | -1.25422700 |

HOOC(CH<sub>2</sub>)<sub>2</sub>COOH (SUA)

|   |             |             |             |
|---|-------------|-------------|-------------|
| C | 0.70396000  | 1.16824600  | -0.29287900 |
| C | -0.70403200 | 1.16823800  | 0.29303100  |
| C | -1.54100800 | -0.03694700 | -0.06854900 |
| C | 1.54076100  | -0.03719600 | 0.06825700  |
| O | 2.55340000  | -0.36297300 | -0.49725400 |
| O | -1.05187900 | -0.71123600 | -1.12992400 |
| O | -2.55330900 | -0.36319800 | 0.49729400  |
| O | 1.05199200  | -0.71131900 | 1.12990400  |
| H | 1.25294800  | 2.04768000  | 0.06112200  |
| H | 0.69067500  | 1.21979700  | -1.38346400 |
| H | -1.25291200 | 2.04785600  | -0.06067600 |
| H | -0.69074100 | 1.21941900  | 1.38363500  |
| H | -1.64538800 | -1.45954400 | -1.29638400 |
| H | 1.64570400  | -1.45944700 | 1.29644700  |

HCHO

|   |             |             |             |
|---|-------------|-------------|-------------|
| C | -0.52446900 | -0.00000200 | -0.00001300 |
| O | 0.66947200  | -0.00002000 | 0.00000300  |
| H | -1.10463600 | -0.93790100 | 0.00002600  |
| H | -1.10432600 | 0.93807300  | 0.00002600  |

CH<sub>3</sub>CHO

|   |             |             |             |
|---|-------------|-------------|-------------|
| C | -1.16624900 | -0.14795600 | -0.00006700 |
| C | 0.23266300  | 0.40151300  | -0.00019700 |
| O | 1.22960400  | -0.27896400 | 0.00004300  |
| H | -1.70535000 | 0.22374800  | -0.87789300 |
| H | -1.70133000 | 0.21659500  | 0.88328000  |
| H | -1.14624600 | -1.23823200 | -0.00432800 |
| H | 0.31761200  | 1.50826100  | 0.00017600  |

CH<sub>3</sub>(CH<sub>2</sub>)<sub>2</sub>CHO

|   |             |             |             |
|---|-------------|-------------|-------------|
| C | -2.29937600 | -0.06719800 | -0.00040300 |
| C | -0.82532400 | -0.46498700 | 0.00057000  |

|   |             |             |             |
|---|-------------|-------------|-------------|
| C | 0.09411600  | 0.74920200  | 0.00042100  |
| C | 1.56142600  | 0.40766500  | -0.00035000 |
| O | 1.99708000  | -0.71872300 | -0.00011500 |
| H | -2.94712900 | -0.94782200 | -0.00058600 |
| H | -2.54630400 | 0.52926300  | -0.88513900 |
| H | -2.54762100 | 0.53026400  | 0.88335500  |
| H | -0.59722200 | -1.08469500 | -0.87304800 |
| H | -0.59821200 | -1.08410200 | 0.87474300  |
| H | -0.09063100 | 1.39292600  | 0.87353400  |
| H | -0.09209400 | 1.39269500  | -0.87236400 |
| H | 2.25751900  | 1.27316000  | -0.00100100 |

CH<sub>3</sub>(CH<sub>2</sub>)<sub>6</sub>CHO

|   |             |             |             |
|---|-------------|-------------|-------------|
| C | -4.92115700 | 0.24163100  | -0.08972200 |
| C | -3.61882500 | -0.55526300 | -0.05808500 |
| C | -2.38253300 | 0.34013600  | -0.00329500 |
| C | -1.07151100 | -0.44291400 | 0.02474300  |
| C | 0.16189500  | 0.45548600  | 0.08317400  |
| C | 1.47190000  | -0.32995400 | 0.10110100  |
| C | 2.70247600  | 0.58330900  | 0.14926600  |
| C | 3.97585100  | -0.21349300 | 0.24907700  |
| O | 4.90533300  | -0.12133200 | -0.51608800 |
| H | -4.95505600 | 0.89797500  | -0.96574900 |
| H | -5.01467100 | 0.87183400  | 0.80099800  |
| H | -5.79451200 | -0.41531900 | -0.12892100 |
| H | -3.55828800 | -1.19941400 | -0.94484300 |
| H | -3.61679700 | -1.22596100 | 0.81091600  |
| H | -2.44084300 | 0.98423200  | 0.88559900  |
| H | -2.38437000 | 1.01406600  | -0.87171500 |
| H | -1.01259400 | -1.08348000 | -0.86625600 |
| H | -1.07080000 | -1.11910900 | 0.89129500  |
| H | 0.10878600  | 1.09163700  | 0.97769800  |
| H | 0.15919600  | 1.13501800  | -0.78002400 |
| H | 1.52746400  | -0.96783000 | -0.79021200 |



|   |            |             |             |
|---|------------|-------------|-------------|
| H | 1.47937500 | -1.00334400 | 0.96926800  |
| H | 2.63945600 | 1.22349000  | 1.04112600  |
| H | 2.76173000 | 1.22868600  | -0.73211200 |
| H | 4.02067300 | -0.93544900 | 1.09407600  |

(CHO)<sub>2</sub>

|   |             |             |             |
|---|-------------|-------------|-------------|
| C | 0.65239200  | -0.39332800 | 0.00015200  |
| C | -0.65279800 | 0.39439600  | 0.00035100  |
| O | 1.71532900  | 0.17131500  | -0.00025300 |
| O | -1.71468900 | -0.17227200 | -0.00029600 |
| H | 0.54369600  | -1.49434700 | 0.00086300  |
| H | -0.54638500 | 1.49560100  | 0.00050500  |

P1

|   |             |             |             |
|---|-------------|-------------|-------------|
| C | 1.67726700  | -0.54872700 | 0.09735300  |
| C | 0.23615300  | -0.95939500 | 0.23867700  |
| O | 2.03238900  | 0.53046600  | -0.32269600 |
| C | -0.74385600 | 0.08247600  | -0.30059100 |
| C | -2.18368700 | -0.37099700 | -0.14170900 |
| O | -0.60878000 | 1.30308300  | 0.40424300  |
| H | 2.43582900  | -1.29527300 | 0.40668800  |
| H | 0.04501400  | -1.13742700 | 1.30731800  |
| H | 0.11005700  | -1.92904600 | -0.26251900 |
| H | -0.52520900 | 0.24284500  | -1.36742800 |
| H | -2.36117600 | -1.30815900 | -0.67736600 |
| H | -2.85850400 | 0.39315300  | -0.53366200 |
| H | -2.41298600 | -0.51958200 | 0.91808100  |
| H | 0.26285100  | 1.66495400  | 0.19412900  |

P2

|   |            |             |             |
|---|------------|-------------|-------------|
| C | 1.53049000 | 0.48849200  | -0.09303100 |
| C | 2.97431000 | 0.55349800  | 0.06074100  |
| C | 3.71963800 | -0.55918800 | -0.07023400 |
| C | 5.20362000 | -0.63507000 | 0.06262600  |

|   |            |             |             |
|---|------------|-------------|-------------|
| O | 0.79839500 | 1.47585800  | 0.02128900  |
| H | 1.09189400 | -0.49854300 | -0.31596400 |
| H | 3.41326700 | 1.52309200  | 0.28267000  |
| H | 3.20530300 | -1.49551200 | -0.29238100 |
| H | 5.65091600 | -1.02345700 | -0.86079900 |
| H | 5.48074200 | -1.33825300 | 0.85781900  |
| H | 5.64770400 | 0.33801900  | 0.28473500  |

P3

|   |             |             |             |
|---|-------------|-------------|-------------|
| C | 0.96183500  | -0.06644100 | 0.37143200  |
| C | -0.38728400 | -0.00123200 | -0.33666200 |
| O | 2.01584900  | -0.00810000 | -0.20289600 |
| O | -1.09277200 | -1.12063000 | 0.11435800  |
| O | -1.04084800 | 1.19551800  | -0.01574900 |
| H | 0.89643100  | -0.15054700 | 1.47777600  |
| H | -0.23832100 | 0.00984600  | -1.42031000 |
| H | -1.92906100 | -1.18287100 | -0.36395400 |
| H | -1.23419200 | 1.19531400  | 0.93216900  |

P4

|   |             |             |             |
|---|-------------|-------------|-------------|
| C | 0.68300900  | 0.31043000  | -0.43192900 |
| C | -0.70330000 | -0.34041600 | -0.40882200 |
| O | 1.69357000  | -0.63771100 | -0.38568600 |
| O | 0.68631400  | 1.15053600  | 0.71021400  |
| O | -0.76470400 | -1.22014300 | 0.69004000  |
| O | -1.70103800 | 0.62791400  | -0.39487500 |
| H | 0.83150100  | 0.89803000  | -1.34403200 |
| H | -0.84720500 | -0.96079600 | -1.29514200 |
| H | 1.56155200  | 1.54301200  | 0.80994300  |
| H | -1.41291500 | 1.35108100  | 0.18068100  |
| H | -0.73712000 | -0.68935500 | 1.49880000  |
| H | 1.41279100  | -1.32682000 | 0.23671600  |

P5

|   |             |             |             |
|---|-------------|-------------|-------------|
| C | -0.33280400 | -0.91292400 | 0.12440800  |
| O | 0.57579300  | -0.80253100 | -0.93873000 |
| C | 1.69470500  | -0.05848600 | -0.49255200 |
| C | 1.07267600  | 0.85504600  | 0.57427700  |
| O | 0.10070200  | -0.02455400 | 1.14246100  |
| C | -1.74802200 | -0.55145800 | -0.33171200 |
| H | 1.77887100  | 1.12352900  | 1.36105700  |
| O | 2.70863800  | -0.86651000 | 0.01445600  |
| O | -1.68516300 | 0.68961800  | -0.99688600 |
| O | -2.59676400 | -0.50234700 | 0.76951500  |
| H | -0.34980100 | -1.92615300 | 0.54597200  |
| H | 2.10558000  | 0.48315200  | -1.34314300 |
| O | 0.52779000  | 2.02009300  | 0.07675000  |
| H | -2.13770700 | -1.32552300 | -1.00129700 |
| H | 2.40416300  | -1.29797900 | 0.82429300  |
| H | -2.58792700 | 1.01032900  | -1.11521300 |
| H | -2.16178300 | 0.04036600  | 1.44602300  |
| H | -0.21869200 | 1.78906400  | -0.50475800 |

P6

|   |             |             |             |
|---|-------------|-------------|-------------|
| H | 0.00018600  | 1.15951300  | 0.89701800  |
| C | 0.00016600  | 0.53216000  | 0.00010200  |
| O | 1.16045400  | -0.24702800 | -0.09406900 |
| O | -1.16041700 | -0.24702700 | 0.09401600  |
| H | 0.00009700  | 1.16046100  | -0.89628400 |
| H | 1.23449500  | -0.78105800 | 0.70626400  |
| H | -1.23607200 | -0.77943300 | -0.70718000 |

P7

|   |             |             |             |
|---|-------------|-------------|-------------|
| C | -1.40013400 | -0.03300400 | -0.08376500 |
| C | 0.04541700  | -0.00261200 | 0.36498500  |
| O | 0.66911600  | -1.14200900 | -0.17558800 |
| O | 0.71102200  | 1.17111300  | -0.03097100 |
| H | -1.92694100 | 0.84402300  | 0.29718500  |

|   |             |             |             |
|---|-------------|-------------|-------------|
| H | -1.89149600 | -0.93868700 | 0.27748700  |
| H | -1.44301600 | -0.03378500 | -1.17815800 |
| H | 0.12167300  | -0.00164900 | 1.45911900  |
| H | 1.59368400  | -1.13798900 | 0.10074200  |
| H | 0.63329600  | 1.24895600  | -0.99122900 |

(SA)(NH<sub>3</sub>)

|   |             |             |             |
|---|-------------|-------------|-------------|
| N | -2.71761100 | 0.04247500  | -0.05227200 |
| H | -2.43377200 | 0.05102800  | 0.92717100  |
| H | -3.15393200 | 0.93392600  | -0.26789600 |
| H | -3.40787500 | -0.69079200 | -0.18378000 |
| S | 0.59694500  | -0.11725400 | 0.08791900  |
| O | -0.40541300 | -0.39430500 | -1.07232100 |
| O | 1.01594800  | 1.42158000  | -0.16192600 |
| H | -1.39912000 | -0.20348200 | -0.73941400 |
| H | 1.74965400  | 1.44233900  | -0.79616900 |
| O | 1.77712600  | -0.92118100 | -0.10756900 |
| O | -0.12301000 | -0.10038000 | 1.34422700  |

(SA)(SUA)

|   |             |             |             |
|---|-------------|-------------|-------------|
| S | -2.34175000 | -0.24414000 | -0.02213500 |
| O | -1.93274000 | -0.04091900 | 1.48793800  |
| O | -1.35223400 | -1.38067300 | -0.52798700 |
| H | -1.06319500 | 0.43804000  | 1.51154200  |
| H | -0.44951000 | -1.04951600 | -0.72330300 |
| O | -2.02827400 | 0.98387700  | -0.74536600 |
| O | -3.65933000 | -0.79771900 | -0.05216300 |
| C | 2.52289100  | 1.43430800  | -0.09724500 |
| C | 3.07746100  | 0.12431300  | 0.44599300  |
| C | 2.38624900  | -1.06482100 | -0.17205700 |
| C | 1.03175700  | 1.50533800  | 0.12167900  |
| O | 0.49211100  | 0.96717900  | 1.08015200  |
| O | 2.95215000  | -2.22158800 | 0.16930000  |
| O | 1.41371700  | -1.00265000 | -0.89827100 |

|   |             |             |             |
|---|-------------|-------------|-------------|
| O | 0.39236700  | 2.18260900  | -0.80456600 |
| H | 2.72283900  | 1.55072700  | -1.16420500 |
| H | 2.98362100  | 2.28053500  | 0.42301200  |
| H | 2.92310400  | 0.05084000  | 1.52767600  |
| H | 4.15221500  | 0.03489700  | 0.26663700  |
| H | 2.44331800  | -2.94369600 | -0.23373900 |
| H | -0.57668000 | 2.02865700  | -0.71596200 |

(SA)(DMA)

|   |             |             |             |
|---|-------------|-------------|-------------|
| S | 1.22476500  | 0.26051000  | 0.03014400  |
| O | 2.04841700  | 1.36514400  | 0.40785300  |
| O | 0.50808500  | 0.36390400  | -1.22356200 |
| O | 0.30925600  | -0.18269400 | 1.10329300  |
| O | 2.21284800  | -0.97634400 | -0.19740000 |
| H | 3.00891200  | -0.81622900 | 0.32104900  |
| H | -1.57655600 | 1.80694500  | -0.29549900 |
| N | -1.90366700 | -0.24543400 | -0.17285300 |
| H | -1.03660400 | -0.31886400 | 0.49042500  |
| C | -2.40487000 | 1.13965400  | -0.07603500 |
| C | -2.91341300 | -1.28217000 | 0.08422900  |
| H | -1.44358800 | -0.36008700 | -1.07985000 |
| H | -3.21334300 | 1.29216400  | -0.78686100 |
| H | -2.76175500 | 1.30948800  | 0.93609400  |
| H | -3.30045000 | -1.15143000 | 1.09110700  |
| H | -3.72681000 | -1.19382500 | -0.63207200 |
| H | -2.44915600 | -2.25989600 | -0.00115000 |

(SA)<sub>2</sub>

|   |             |             |             |
|---|-------------|-------------|-------------|
| S | -2.04517800 | 0.06671500  | 0.12479200  |
| O | -1.46679500 | 0.96387400  | -1.02629900 |
| O | -2.13080000 | -1.38169500 | -0.54813400 |
| H | -0.50564500 | 0.74843200  | -1.16836200 |
| H | -2.90494900 | -1.42971000 | -1.13387100 |
| O | -3.36250000 | 0.54337100  | 0.42528500  |

|   |             |             |             |
|---|-------------|-------------|-------------|
| O | -1.04491900 | -0.09359100 | 1.16600500  |
| S | 2.04515900  | -0.06674800 | -0.12478200 |
| O | 2.13093000  | 1.38177100  | 0.54786200  |
| O | 1.46694000  | -0.96369800 | 1.02656400  |
| H | 2.90541400  | 1.43002600  | 1.13313500  |
| H | 0.50587200  | -0.74813700 | 1.16884300  |
| O | 3.36241200  | -0.54347300 | -0.42545800 |
| O | 1.04468400  | 0.09343200  | -1.16581400 |

(SA)(HCHO)

|   |             |             |             |
|---|-------------|-------------|-------------|
| S | 0.90512300  | 0.10269000  | -0.11841100 |
| O | 2.18443200  | -0.04285000 | -0.75739100 |
| O | 0.04007600  | 1.23663600  | -0.34331800 |
| O | 1.13120100  | 0.07262800  | 1.47369200  |
| O | 0.09449200  | -1.22177300 | -0.37418000 |
| H | -0.87907900 | -1.05287300 | -0.20068000 |
| H | 1.89054500  | -0.49773500 | 1.67514800  |
| C | -2.88833200 | 0.47186500  | -0.00468000 |
| O | -2.44623600 | -0.65676500 | 0.06574300  |
| H | -3.96172100 | 0.64865200  | 0.16373000  |
| H | -2.23344700 | 1.32471000  | -0.23190700 |

(SA)(CH<sub>3</sub>CHO)

|   |             |             |             |
|---|-------------|-------------|-------------|
| S | -1.38387500 | -0.12628000 | -0.12043700 |
| O | -0.45550800 | -1.18722900 | -0.43596000 |
| O | -2.68379500 | -0.02736600 | -0.72840300 |
| O | -0.66586200 | 1.25754200  | -0.29302700 |
| O | -1.58526600 | -0.22355400 | 1.47422200  |
| H | -2.38248500 | 0.27190000  | 1.72159300  |
| H | 0.33246500  | 1.14785000  | -0.14250800 |
| C | 3.88585200  | -0.34800300 | 0.06252400  |
| C | 2.41489600  | -0.15900000 | -0.09776000 |
| O | 1.87118200  | 0.92219400  | 0.06353000  |
| H | 4.30096300  | -0.72944900 | -0.87652100 |

|   |            |             |             |
|---|------------|-------------|-------------|
| H | 4.06773000 | -1.11525900 | 0.82248500  |
| H | 4.37017200 | 0.58780500  | 0.34085400  |
| H | 1.80265600 | -1.03305400 | -0.37038700 |

(SA)(CH<sub>3</sub>(CH<sub>2</sub>)<sub>2</sub>CHO)

|   |             |             |             |
|---|-------------|-------------|-------------|
| S | 2.39214400  | 0.09281000  | -0.06549100 |
| O | 3.72082300  | -0.02591800 | -0.60431400 |
| O | 1.58950000  | 1.28314900  | -0.22801300 |
| O | 2.47841100  | -0.12192800 | 1.52869600  |
| O | 1.56979100  | -1.15577700 | -0.53572000 |
| H | 0.57441700  | -0.98069100 | -0.41316100 |
| H | 3.19650100  | -0.74526100 | 1.72325800  |
| C | -5.20364900 | -0.10142300 | 0.17717200  |
| C | -3.72913700 | -0.47603300 | 0.05000100  |
| C | -2.83982900 | 0.75669700  | -0.04994500 |
| C | -1.38044200 | 0.46514000  | -0.18808700 |
| O | -0.93832800 | -0.67330200 | -0.23190600 |
| H | -5.83113600 | -0.99316400 | 0.24898900  |
| H | -5.54031500 | 0.47516200  | -0.69062900 |
| H | -5.38134900 | 0.50567000  | 1.07093900  |
| H | -3.57016300 | -1.10368500 | -0.83296400 |
| H | -3.41340900 | -1.07584700 | 0.90990300  |
| H | -2.95175400 | 1.41277900  | 0.82634200  |
| H | -3.11724600 | 1.38799100  | -0.90777400 |
| H | -0.68310000 | 1.31599700  | -0.25183200 |

(SA)(CH<sub>3</sub>(CH<sub>2</sub>)<sub>6</sub>CHO)

|   |            |             |             |
|---|------------|-------------|-------------|
| C | 7.95596100 | -0.43690500 | 0.11355100  |
| C | 6.54813400 | -0.89703900 | -0.25836600 |
| C | 5.47152200 | 0.09409500  | 0.17958800  |
| C | 4.05802700 | -0.35001600 | -0.19173700 |
| C | 2.98598200 | 0.64415400  | 0.24880900  |
| C | 1.57365900 | 0.20002800  | -0.12799900 |
| C | 0.51319400 | 1.21918400  | 0.31433600  |

|   |             |             |             |
|---|-------------|-------------|-------------|
| C | -0.86690500 | 0.73113400  | 0.01869000  |
| O | -1.67637100 | 1.37839700  | -0.62842200 |
| H | 8.05212300  | -0.31091900 | 1.19712100  |
| H | 8.18771600  | 0.52544400  | -0.35475000 |
| H | 8.71265300  | -1.15747200 | -0.20877700 |
| H | 6.34580400  | -1.87432400 | 0.19846500  |
| H | 6.48174300  | -1.04419800 | -1.34407200 |
| H | 5.67496200  | 1.07435200  | -0.27412600 |
| H | 5.53366400  | 0.23952600  | 1.26738900  |
| H | 3.85428700  | -1.33021000 | 0.26125000  |
| H | 3.99626400  | -0.49327100 | -1.27947200 |
| H | 3.19013700  | 1.62476700  | -0.20206600 |
| H | 3.04284100  | 0.78481800  | 1.33712800  |
| H | 1.36210300  | -0.77445500 | 0.33110300  |
| H | 1.51184600  | 0.05749000  | -1.21401400 |
| H | 0.65934600  | 2.19314200  | -0.16110400 |
| H | 0.58110100  | 1.35170300  | 1.40401200  |
| H | -1.15594900 | -0.26199400 | 0.40273200  |
| S | -4.43584100 | -0.52550000 | 0.01322900  |
| O | -5.59507100 | -1.24601100 | -0.44187500 |
| O | -3.24098700 | -1.18887700 | 0.48111500  |
| O | -4.88051800 | 0.41510900  | 1.24361100  |
| O | -4.05529700 | 0.51599300  | -1.09506300 |
| H | -3.11492300 | 0.86837400  | -0.92808600 |
| H | -5.79374600 | 0.71053300  | 1.09943500  |

(SA)((CHO)<sub>2</sub>)

|   |             |             |             |
|---|-------------|-------------|-------------|
| S | -1.38780300 | -0.26878000 | -0.00970300 |
| O | -2.50106900 | -1.05845100 | 0.43588400  |
| O | -0.18036800 | -0.84384000 | -0.55146300 |
| O | -1.89404700 | 0.75710600  | -1.13281600 |
| O | -1.00818900 | 0.69661100  | 1.18748100  |
| H | -0.14699800 | 1.14009100  | 0.99216800  |
| H | -2.81840000 | 0.99722200  | -0.95546700 |



|   |            |             |             |
|---|------------|-------------|-------------|
| C | 2.20186900 | 0.87594900  | -0.25240100 |
| C | 2.42497600 | -0.53151200 | 0.29204100  |
| O | 1.37614700 | 1.62779700  | 0.21438000  |
| O | 3.30319300 | -1.20771700 | -0.17404900 |
| H | 2.86842100 | 1.17430600  | -1.07963100 |
| H | 1.77542100 | -0.84978900 | 1.12500300  |

(SA)(P1)

|   |             |             |             |
|---|-------------|-------------|-------------|
| S | -1.79868500 | -0.17883700 | -0.03524700 |
| O | -3.21902800 | -0.31068200 | -0.22197800 |
| O | -0.92214600 | -1.31910900 | 0.10343200  |
| O | -1.56116500 | 0.67030400  | 1.32621800  |
| O | -1.24138300 | 0.78609900  | -1.12696000 |
| H | -0.20871200 | 0.69794900  | -1.19606600 |
| H | -2.31779800 | 1.26311700  | 1.46061900  |
| C | 1.86618600  | -1.60263600 | 0.57440300  |
| C | 1.78372000  | -0.16318600 | 1.01183700  |
| O | 2.19974600  | -1.93842100 | -0.54258800 |
| C | 2.05760400  | 0.82319100  | -0.12166700 |
| C | 1.74751600  | 2.25328300  | 0.27439400  |
| O | 1.25054700  | 0.51661900  | -1.27355700 |
| H | 1.61442600  | -2.36533100 | 1.33256500  |
| H | 2.51693700  | -0.01516000 | 1.81695700  |
| H | 0.79631600  | 0.00240200  | 1.46040300  |
| H | 3.10454600  | 0.73432000  | -0.43460100 |
| H | 1.94541000  | 2.93020200  | -0.55958800 |
| H | 2.36501700  | 2.55253700  | 1.12556700  |
| H | 0.69529500  | 2.34482700  | 0.56318200  |
| H | 1.48479500  | -0.38587500 | -1.55542900 |

(SA)(P2)

|   |             |             |             |
|---|-------------|-------------|-------------|
| S | -2.22223000 | -0.25441100 | -0.11357000 |
| O | -1.11880200 | -1.14886000 | -0.38226900 |
| O | -3.51216000 | -0.41384400 | -0.73222700 |

|   |             |             |             |
|---|-------------|-------------|-------------|
| O | -1.76107900 | 1.22386100  | -0.33014200 |
| O | -2.42564400 | -0.33421200 | 1.48342800  |
| H | -3.29236900 | 0.04083000  | 1.70677100  |
| H | -0.74908200 | 1.30873800  | -0.17742100 |
| C | 1.49335200  | 0.44987300  | -0.07014700 |
| C | 2.94019900  | 0.55217400  | 0.05862900  |
| C | 3.69221300  | -0.55328900 | -0.05464700 |
| C | 5.17954400  | -0.59749900 | 0.04647400  |
| O | 0.74977500  | 1.42361000  | 0.01729100  |
| H | 1.06401900  | -0.54814600 | -0.25444000 |
| H | 3.36519100  | 1.53634700  | 0.23965000  |
| H | 3.18474300  | -1.50227600 | -0.23694800 |
| H | 5.60861500  | -1.00319000 | -0.87576400 |
| H | 5.48434100  | -1.26660700 | 0.85795300  |
| H | 5.60164900  | 0.39287800  | 0.22680400  |

(SA)<sub>2</sub>(P1)

|   |             |             |             |
|---|-------------|-------------|-------------|
| S | 0.79777900  | 2.05238000  | 0.21221300  |
| O | 0.26902900  | 1.00221400  | 1.11072000  |
| O | 1.19337200  | 3.31051300  | 0.76229200  |
| O | -0.30737000 | 2.32197600  | -0.88558800 |
| O | 1.98609700  | 1.42785800  | -0.57497100 |
| H | 1.75743400  | 0.46058200  | -0.89854100 |
| H | -0.72057700 | 1.47203100  | -1.17811600 |
| S | -2.53093900 | -0.38069600 | -0.28536500 |
| O | -3.79102100 | 0.04530000  | -0.80773400 |
| O | -1.31260700 | -0.20646400 | -1.09898800 |
| O | -2.66725000 | -1.90340600 | 0.08939800  |
| O | -2.25090800 | 0.30463700  | 1.10298700  |
| H | -1.29719700 | 0.61545900  | 1.16806600  |
| H | -1.82588300 | -2.21240700 | 0.50161200  |
| C | 0.76057200  | -1.69265200 | 1.52384600  |
| C | 2.16504200  | -1.52602000 | 1.02981900  |
| O | -0.11093300 | -2.17272300 | 0.82081700  |

|   |            |             |             |
|---|------------|-------------|-------------|
| C | 2.29476500 | -1.81918500 | -0.46380000 |
| C | 3.71257300 | -1.62321100 | -0.96524700 |
| O | 1.45645400 | -0.92354100 | -1.21662500 |
| H | 0.53444700 | -1.37668500 | 2.55530500  |
| H | 2.80813300 | -2.19928900 | 1.61386900  |
| H | 2.49081900 | -0.50465100 | 1.26636400  |
| H | 1.95393000 | -2.83944100 | -0.66838300 |
| H | 4.04308800 | -0.59435200 | -0.78982100 |
| H | 3.76303000 | -1.82782000 | -2.03645600 |
| H | 4.39613400 | -2.29946400 | -0.44528900 |
| H | 0.51059800 | -1.12540900 | -1.08432700 |

(SA)(P1)<sub>2</sub>

|   |             |             |             |
|---|-------------|-------------|-------------|
| S | -0.00002700 | -1.16621200 | -0.00010100 |
| O | 1.25159300  | -1.87496500 | 0.15596200  |
| O | -1.25175500 | -1.87477500 | -0.15616000 |
| O | 0.10995800  | -0.17766500 | -1.22703100 |
| O | -0.10987200 | -0.17766100 | 1.22683700  |
| H | -1.06484800 | 0.20065900  | 1.27737400  |
| H | 1.06491500  | 0.20070200  | -1.27745000 |
| C | -3.93060300 | -0.91378300 | -0.59820500 |
| C | -3.22687300 | 0.35341900  | -1.00344400 |
| O | -4.39052200 | -1.09504600 | 0.51031600  |
| C | -3.05025700 | 1.34106000  | 0.14956800  |
| C | -2.12262400 | 2.48180800  | -0.22096800 |
| O | -2.48954900 | 0.69153200  | 1.30440300  |
| H | -4.02580500 | -1.69470100 | -1.37346800 |
| H | -3.81684000 | 0.82076600  | -1.80453500 |
| H | -2.26278000 | 0.08096600  | -1.45009900 |
| H | -4.03104100 | 1.73088300  | 0.44829400  |
| H | -1.98849400 | 3.15567300  | 0.62860300  |
| H | -2.53837200 | 3.04949700  | -1.05799300 |
| H | -1.14812200 | 2.08656900  | -0.52643700 |
| H | -3.10057200 | -0.02601400 | 1.55118900  |

|   |            |             |             |
|---|------------|-------------|-------------|
| C | 3.93039100 | -0.91394000 | 0.59827800  |
| C | 3.22675500 | 0.35329900  | 1.00354900  |
| O | 4.39047400 | -1.09511200 | -0.51019000 |
| C | 3.05036800 | 1.34099800  | -0.14943700 |
| C | 2.12287300 | 2.48187600  | 0.22105000  |
| O | 2.48965800 | 0.69154500  | -1.30431200 |
| H | 4.02535200 | -1.69497000 | 1.37345800  |
| H | 3.81671300 | 0.82053800  | 1.80471300  |
| H | 2.26258800 | 0.08093300  | 1.45010000  |
| H | 4.03123300 | 1.73067900  | -0.44808000 |
| H | 1.98892900 | 3.15579300  | -0.62850900 |
| H | 2.53862700 | 3.04946800  | 1.05813800  |
| H | 1.14828300 | 2.08677200  | 0.52641100  |
| H | 3.10062200 | -0.02606600 | -1.55105000 |

(SA)(P1)(DMA)

|   |             |             |             |
|---|-------------|-------------|-------------|
| S | 1.61926000  | -0.96594000 | -0.03528000 |
| O | 2.12886000  | 0.03485000  | -1.00732900 |
| O | 0.72819000  | -1.95742900 | -0.66582500 |
| O | 1.09021600  | -0.34512300 | 1.18382600  |
| O | 2.91116000  | -1.79475000 | 0.47913200  |
| H | 3.22698500  | -2.34519900 | -0.25367200 |
| H | -0.37083500 | 1.43277400  | -0.13259900 |
| C | -1.46953700 | 0.14573800  | 1.87905500  |
| C | -1.96290100 | -1.00044300 | 1.04232400  |
| O | -1.52739900 | 1.31249500  | 1.54160500  |
| C | -2.41236300 | -0.60023400 | -0.36120100 |
| C | -3.03611800 | -1.77600300 | -1.10101200 |
| O | -1.32032500 | -0.06671600 | -1.10663000 |
| H | -1.05763400 | -0.12129200 | 2.86881900  |
| H | -1.15818500 | -1.74659300 | 0.99111300  |
| H | -2.79003200 | -1.46914100 | 1.59557900  |
| H | -3.13314300 | 0.22121200  | -0.28522300 |
| H | -3.32958000 | -1.47202100 | -2.10867600 |

|   |             |             |             |
|---|-------------|-------------|-------------|
| H | -2.31281700 | -2.59536700 | -1.18121300 |
| H | -3.92069600 | -2.14783200 | -0.57501700 |
| H | -0.68012000 | -0.79165700 | -1.24489900 |
| N | 0.38670100  | 2.06436500  | -0.44268700 |
| C | 0.91978900  | 2.81556400  | 0.71591900  |
| C | -0.14167700 | 2.90144600  | -1.53908500 |
| H | 1.12672000  | 1.41211100  | -0.79604300 |
| H | 1.29017600  | 2.08595400  | 1.43613300  |
| H | 0.11334300  | 3.40119000  | 1.15767200  |
| H | 1.72779200  | 3.46377900  | 0.37270300  |
| H | 0.66326700  | 3.51712000  | -1.94281600 |
| H | -0.93707200 | 3.53651300  | -1.14580300 |
| H | -0.54202000 | 2.23991900  | -2.30699700 |

(P1)(H<sub>2</sub>O)

|   |             |             |             |
|---|-------------|-------------|-------------|
| O | -1.60506900 | 1.92639100  | -0.27428600 |
| H | -2.20011700 | 2.60424000  | 0.05720300  |
| H | -1.32904000 | 1.38375600  | 0.48501900  |
| C | 1.85092800  | 0.28300400  | -0.56037700 |
| C | 0.51971500  | -0.28327600 | -0.96652700 |
| O | 2.26545600  | 0.28656800  | 0.57979300  |
| C | -0.21310800 | -0.98146000 | 0.17921300  |
| C | -1.57335500 | -1.49476200 | -0.25611700 |
| O | -0.42908200 | -0.07664400 | 1.26315800  |
| H | 2.46639600  | 0.72413200  | -1.36861000 |
| H | 0.68415700  | -0.97399800 | -1.80469300 |
| H | -0.08984100 | 0.54581600  | -1.35728600 |
| H | 0.40440500  | -1.81644400 | 0.53936600  |
| H | -1.46812300 | -2.22769600 | -1.06119400 |
| H | -2.18633500 | -0.66192200 | -0.61482300 |
| H | -2.08020200 | -1.96989100 | 0.58701700  |
| H | 0.44317800  | 0.16045700  | 1.61152800  |

(P1)(DMA)

|   |             |             |             |
|---|-------------|-------------|-------------|
| C | 0.99201600  | 1.84055400  | -0.09206800 |
| C | 1.55187400  | 0.58241000  | -0.69605000 |
| O | -0.06668400 | 2.33461900  | -0.41098100 |
| C | 1.78711600  | -0.46800800 | 0.40584400  |
| C | 2.14471600  | -1.82207700 | -0.19687800 |
| O | 0.66736000  | -0.55450100 | 1.25481000  |
| H | 1.60533600  | 2.30983700  | 0.70363600  |
| H | 2.50325000  | 0.81623900  | -1.19163500 |
| H | 0.84985600  | 0.20948200  | -1.45058100 |
| H | 2.61879800  | -0.12697300 | 1.03738400  |
| H | 1.31576800  | -2.18517000 | -0.81512400 |
| H | 2.31687200  | -2.54668300 | 0.60237600  |
| H | 3.04275300  | -1.76088500 | -0.82059200 |
| H | -0.15815500 | -0.56536700 | 0.70418600  |
| N | -1.68614400 | -0.21499400 | -0.17479000 |
| C | -2.54549600 | 0.20791000  | 0.92889400  |
| C | -2.27553300 | -1.28681200 | -0.96753600 |
| H | -1.48391700 | 0.59521800  | -0.75813700 |
| H | -2.08337300 | 1.05777100  | 1.43630400  |
| H | -2.63828500 | -0.61288200 | 1.64710200  |
| H | -3.55471700 | 0.49412800  | 0.59685700  |
| H | -3.26977900 | -1.03150000 | -1.36506100 |
| H | -2.37831100 | -2.17945400 | -0.34253700 |
| H | -1.61665600 | -1.53361500 | -1.80452000 |

(P1)(SUA)

|   |             |             |             |
|---|-------------|-------------|-------------|
| C | -1.03226400 | 1.83874800  | -0.40538900 |
| C | -1.54344900 | 0.99685100  | 0.73458600  |
| O | -1.64571800 | 1.99782800  | -1.43864600 |
| C | -2.80874500 | 0.22352200  | 0.37219300  |
| C | -3.26845500 | -0.68476900 | 1.49693600  |
| O | -2.57887400 | -0.61025800 | -0.77136900 |
| H | -0.05418100 | 2.33017300  | -0.24938800 |
| H | -1.73830900 | 1.67186200  | 1.58042000  |

|   |             |             |             |
|---|-------------|-------------|-------------|
| H | -0.73419800 | 0.33319900  | 1.06439100  |
| H | -3.60241500 | 0.93645000  | 0.11516200  |
| H | -4.16609500 | -1.23077100 | 1.19773000  |
| H | -3.49432300 | -0.09993300 | 2.39292400  |
| H | -2.48446900 | -1.40833200 | 1.74348900  |
| H | -2.33720900 | -0.02848500 | -1.51049600 |
| C | 1.90042900  | -1.79729000 | -0.02603000 |
| C | 2.98136600  | -0.75104600 | -0.23205000 |
| C | 2.67099000  | 0.52196400  | 0.51473500  |
| C | 0.57275100  | -1.32360800 | -0.57419900 |
| O | 0.45487300  | -0.35737100 | -1.30244600 |
| O | 3.57418500  | 1.48371800  | 0.26036600  |
| O | 1.74057400  | 0.69018000  | 1.26950200  |
| O | -0.44823900 | -2.06778400 | -0.16998500 |
| H | 1.76567300  | -2.03548100 | 1.03249200  |
| H | 2.16208600  | -2.73054800 | -0.53559600 |
| H | 3.08813600  | -0.49230700 | -1.28953700 |
| H | 3.95642700  | -1.11007500 | 0.11299500  |
| H | 3.32142500  | 2.26755800  | 0.77198400  |
| H | -1.29268700 | -1.64004300 | -0.49063000 |

(P1)<sub>2</sub>

|   |             |             |             |
|---|-------------|-------------|-------------|
| C | -1.72646100 | 1.62035000  | -0.81925800 |
| C | -2.05184700 | 0.71805700  | 0.33707400  |
| O | -0.71923000 | 2.28611400  | -0.90361500 |
| C | -2.28568200 | -0.71321400 | -0.17105600 |
| C | -2.58814600 | -1.67396800 | 0.97196200  |
| O | -1.17487900 | -1.14021300 | -0.93389500 |
| H | -2.47342300 | 1.64180400  | -1.63994300 |
| H | -2.96201600 | 1.09082900  | 0.82656500  |
| H | -1.22653300 | 0.75157400  | 1.05775000  |
| H | -3.13301200 | -0.70264200 | -0.86906600 |
| H | -1.74029000 | -1.71499500 | 1.66480600  |
| H | -2.75547600 | -2.67880900 | 0.57715500  |

|   |             |             |             |
|---|-------------|-------------|-------------|
| H | -3.47537000 | -1.36052900 | 1.53040200  |
| H | -0.42751200 | -1.28058300 | -0.32127600 |
| C | 1.66031800  | 1.64033000  | 0.51543400  |
| C | 1.93723600  | 0.59416400  | -0.53263400 |
| O | 1.45560800  | 1.37636900  | 1.68452900  |
| C | 2.15906800  | -0.80365900 | 0.04180900  |
| C | 2.35086100  | -1.83962100 | -1.05075200 |
| O | 1.03007400  | -1.21390200 | 0.81623300  |
| H | 1.64910500  | 2.68936900  | 0.17500100  |
| H | 2.80766900  | 0.91678400  | -1.11900800 |
| H | 1.08151200  | 0.59459800  | -1.22316900 |
| H | 3.04169000  | -0.78648100 | 0.69664900  |
| H | 1.47151700  | -1.86700000 | -1.70281800 |
| H | 2.48774600  | -2.82901800 | -0.60834100 |
| H | 3.22794000  | -1.60073000 | -1.65868500 |
| H | 0.96178200  | -0.58575400 | 1.55248300  |

(SA)(P3)

|   |             |             |             |
|---|-------------|-------------|-------------|
| S | 1.91355800  | 0.07504600  | -0.00920800 |
| O | 3.24771600  | 0.32103900  | -0.47917000 |
| O | 1.02972700  | 1.14793900  | 0.40105400  |
| O | 1.98318300  | -0.87791500 | 1.28133300  |
| O | 1.18498000  | -0.81970800 | -1.06867300 |
| H | 0.19578400  | -0.87009200 | -0.85226300 |
| H | 2.72924500  | -1.49233000 | 1.18620700  |
| C | -3.32688200 | 0.14439400  | 0.41064400  |
| C | -1.81209600 | 0.30378600  | 0.29924600  |
| O | -3.88742000 | -0.80956900 | -0.06747400 |
| O | -1.28846700 | -0.84334700 | -0.34140100 |
| O | -1.61840400 | 1.47007000  | -0.41794800 |
| H | -3.86788000 | 0.96481700  | 0.91001300  |
| H | -1.34261600 | 0.35219000  | 1.28949400  |
| H | -2.01337900 | -1.29772600 | -0.80596400 |
| H | -0.69472300 | 1.74525600  | -0.30128200 |



(SA)(P4)

|   |             |             |             |
|---|-------------|-------------|-------------|
| S | 2.28388800  | -0.11342500 | -0.08294000 |
| O | 1.36261000  | -1.08724800 | -0.63356500 |
| O | 3.67072900  | -0.08685700 | -0.45216400 |
| O | 2.16683000  | -0.33682200 | 1.50557800  |
| O | 1.70347500  | 1.32730100  | -0.27088400 |
| H | 0.69461600  | 1.32583200  | -0.11988600 |
| H | 2.91148900  | 0.10297000  | 1.94756300  |
| C | -1.40370200 | -0.09377200 | 0.20828900  |
| C | -2.89119900 | 0.05612700  | 0.54399000  |
| O | -0.81776400 | 1.19932800  | 0.16963100  |
| O | -1.36222400 | -0.72131800 | -1.03324300 |
| O | -3.43922200 | 1.01748200  | -0.33464700 |
| O | -3.52673500 | -1.17254400 | 0.47664000  |
| H | -0.85641600 | -0.65522100 | 0.97178800  |
| H | -3.02294800 | 0.46035100  | 1.54930500  |
| H | -0.45269500 | -1.01938300 | -1.20111500 |
| H | -3.12897700 | -1.67696300 | -0.24924300 |
| H | -3.53646800 | 0.60784900  | -1.20587600 |
| H | -1.44297000 | 1.78064500  | -0.29794800 |

(SA)(P5)

|   |             |             |             |
|---|-------------|-------------|-------------|
| S | 2.45438800  | -0.15693900 | -0.01541400 |
| O | 3.83734000  | -0.48692500 | -0.15920100 |
| O | 1.58581000  | -0.96836500 | 0.83833100  |
| O | 1.78815400  | -0.13266200 | -1.45674900 |
| O | 2.36562000  | 1.34562000  | 0.44597900  |
| H | 1.40910400  | 1.61960200  | 0.51864100  |
| H | 0.82202100  | -0.32315400 | -1.37612200 |
| C | -1.80204600 | 0.43887700  | -0.76040300 |
| O | -0.84710200 | -0.58020100 | -0.98488400 |
| C | -1.21440600 | -1.72166100 | -0.19823200 |
| C | -1.83727800 | -1.03225500 | 1.02148700  |

|   |             |             |             |
|---|-------------|-------------|-------------|
| O | -2.52405300 | 0.05223500  | 0.39770400  |
| C | -1.13399300 | 1.79871500  | -0.52722400 |
| H | -2.59710700 | -1.63199300 | 1.52537800  |
| O | -2.09397500 | -2.55402500 | -0.85944000 |
| O | -0.24701400 | 1.74041600  | 0.56370300  |
| O | -2.12169600 | 2.75939200  | -0.36052800 |
| H | -2.50213000 | 0.51532900  | -1.59979700 |
| H | -0.30153600 | -2.28050400 | 0.00746000  |
| O | -0.90804500 | -0.57361900 | 1.94494800  |
| H | -0.54394300 | 2.09263200  | -1.39896400 |
| H | -2.96631400 | -2.14031700 | -0.92008600 |
| H | -0.63987600 | 1.23195200  | 1.30081100  |
| H | -2.71223400 | 2.48297600  | 0.35538700  |
| H | 0.00782800  | -0.77247900 | 1.66124000  |

(SA)(P3)<sub>2</sub>

|   |             |             |             |
|---|-------------|-------------|-------------|
| S | -0.00002700 | -1.16621200 | -0.00010100 |
| O | 1.25159300  | -1.87496500 | 0.15596200  |
| O | -1.25175500 | -1.87477500 | -0.15616000 |
| O | 0.10995800  | -0.17766500 | -1.22703100 |
| O | -0.10987200 | -0.17766100 | 1.22683700  |
| H | -1.06484800 | 0.20065900  | 1.27737400  |
| H | 1.06491500  | 0.20070200  | -1.27745000 |
| C | -3.93060300 | -0.91378300 | -0.59820500 |
| C | -3.22687300 | 0.35341900  | -1.00344400 |
| O | -4.39052200 | -1.09504600 | 0.51031600  |
| C | -3.05025700 | 1.34106000  | 0.14956800  |
| C | -2.12262400 | 2.48180800  | -0.22096800 |
| O | -2.48954900 | 0.69153200  | 1.30440300  |
| H | -4.02580500 | -1.69470100 | -1.37346800 |
| H | -3.81684000 | 0.82076600  | -1.80453500 |
| H | -2.26278000 | 0.08096600  | -1.45009900 |
| H | -4.03104100 | 1.73088300  | 0.44829400  |
| H | -1.98849400 | 3.15567300  | 0.62860300  |

|   |             |             |             |
|---|-------------|-------------|-------------|
| H | -2.53837200 | 3.04949700  | -1.05799300 |
| H | -1.14812200 | 2.08656900  | -0.52643700 |
| H | -3.10057200 | -0.02601400 | 1.55118900  |
| C | 3.93039100  | -0.91394000 | 0.59827800  |
| C | 3.22675500  | 0.35329900  | 1.00354900  |
| O | 4.39047400  | -1.09511200 | -0.51019000 |
| C | 3.05036800  | 1.34099800  | -0.14943700 |
| C | 2.12287300  | 2.48187600  | 0.22105000  |
| O | 2.48965800  | 0.69154500  | -1.30431200 |
| H | 4.02535200  | -1.69497000 | 1.37345800  |
| H | 3.81671300  | 0.82053800  | 1.80471300  |
| H | 2.26258800  | 0.08093300  | 1.45010000  |
| H | 4.03123300  | 1.73067900  | -0.44808000 |
| H | 1.98892900  | 3.15579300  | -0.62850900 |
| H | 2.53862700  | 3.04946800  | 1.05813800  |
| H | 1.14828300  | 2.08677200  | 0.52641100  |
| H | 3.10062200  | -0.02606600 | -1.55105000 |

(SA)<sub>2</sub>(P3)

|   |             |             |             |
|---|-------------|-------------|-------------|
| S | 0.79777900  | 2.05238000  | 0.21221300  |
| O | 0.26902900  | 1.00221400  | 1.11072000  |
| O | 1.19337200  | 3.31051300  | 0.76229200  |
| O | -0.30737000 | 2.32197600  | -0.88558800 |
| O | 1.98609700  | 1.42785800  | -0.57497100 |
| H | 1.75743400  | 0.46058200  | -0.89854100 |
| H | -0.72057700 | 1.47203100  | -1.17811600 |
| S | -2.53093900 | -0.38069600 | -0.28536500 |
| O | -3.79102100 | 0.04530000  | -0.80773400 |
| O | -1.31260700 | -0.20646400 | -1.09898800 |
| O | -2.66725000 | -1.90340600 | 0.08939800  |
| O | -2.25090800 | 0.30463700  | 1.10298700  |
| H | -1.29719700 | 0.61545900  | 1.16806600  |
| H | -1.82588300 | -2.21240700 | 0.50161200  |
| C | 0.76057200  | -1.69265200 | 1.52384600  |

|   |             |             |             |
|---|-------------|-------------|-------------|
| C | 2.16504200  | -1.52602000 | 1.02981900  |
| O | -0.11093300 | -2.17272300 | 0.82081700  |
| C | 2.29476500  | -1.81918500 | -0.46380000 |
| C | 3.71257300  | -1.62321100 | -0.96524700 |
| O | 1.45645400  | -0.92354100 | -1.21662500 |
| H | 0.53444700  | -1.37668500 | 2.55530500  |
| H | 2.80813300  | -2.19928900 | 1.61386900  |
| H | 2.49081900  | -0.50465100 | 1.26636400  |
| H | 1.95393000  | -2.83944100 | -0.66838300 |
| H | 4.04308800  | -0.59435200 | -0.78982100 |
| H | 3.76303000  | -1.82782000 | -2.03645600 |
| H | 4.39613400  | -2.29946400 | -0.44528900 |
| H | 0.51059800  | -1.12540900 | -1.08432700 |

(SA)<sub>2</sub>(P3)<sub>2</sub>

|   |             |             |             |
|---|-------------|-------------|-------------|
| S | 0.35700300  | 2.10583000  | 0.28790600  |
| O | 0.15269500  | 1.16231300  | -0.79947200 |
| O | 1.60702700  | 2.82344900  | 0.37122100  |
| O | 0.11494400  | 1.36616700  | 1.65476900  |
| O | -0.77798800 | 3.19837700  | 0.27086000  |
| H | -1.65164000 | 2.73260200  | 0.27660400  |
| H | -0.33324200 | 0.48431700  | 1.50558000  |
| S | -0.44525400 | -2.08040600 | 0.73324400  |
| O | -1.18291900 | -0.87120300 | 1.15240700  |
| O | 0.45054100  | -2.67868900 | 1.67995800  |
| O | 0.26027000  | -1.76491600 | -0.62678600 |
| O | -1.49450900 | -3.15032900 | 0.26908300  |
| H | -2.11207100 | -2.75362200 | -0.39192900 |
| H | 1.11457700  | -1.21973600 | -0.44183100 |
| C | -2.55701200 | -0.34013700 | -1.25913300 |
| C | -3.40151100 | 0.88360400  | -0.89747400 |
| O | -3.05470900 | -1.44815000 | -1.19318100 |
| O | -4.72232700 | 0.54732600  | -0.73111500 |
| O | -2.82704300 | 1.43802800  | 0.27872300  |

|   |             |             |             |
|---|-------------|-------------|-------------|
| H | -1.49637900 | -0.17494400 | -1.49271500 |
| H | -3.30574200 | 1.66811000  | -1.65404500 |
| H | -4.79132000 | -0.41762700 | -0.64836600 |
| H | -2.84499700 | 0.78432500  | 0.99579000  |
| C | 4.31263000  | -0.59041900 | -1.28232600 |
| C | 3.21490000  | 0.26168800  | -0.64603000 |
| O | 4.43459200  | -1.75787700 | -1.01388700 |
| O | 2.36311200  | -0.57167700 | 0.12818500  |
| O | 3.88553900  | 1.19362300  | 0.11696500  |
| H | 5.00632100  | -0.05904200 | -1.95604100 |
| H | 2.56427500  | 0.71881700  | -1.40212900 |
| H | 2.90619600  | -1.25570100 | 0.55947300  |
| H | 3.26820000  | 1.90575700  | 0.35915300  |

(SA)(P3)<sub>3</sub>

|   |             |             |             |
|---|-------------|-------------|-------------|
| C | -2.21291900 | -1.22872600 | -1.95212000 |
| C | -1.72062300 | 0.17742400  | -1.62122200 |
| O | -2.48575200 | -2.02319300 | -1.08583900 |
| O | -2.44020500 | 1.05746700  | -2.41549700 |
| O | -1.86966900 | 0.42672700  | -0.24333600 |
| H | -2.29767800 | -1.47240000 | -3.02498600 |
| H | -0.63903800 | 0.23297000  | -1.80337600 |
| H | -1.98692900 | 1.91292900  | -2.39232100 |
| H | -2.80955700 | 0.42440800  | -0.00336700 |
| C | -1.49302400 | -0.31283100 | 2.90701900  |
| C | -0.36787900 | -1.19546000 | 2.35841500  |
| O | -2.57659200 | -0.26475800 | 2.38342800  |
| O | -0.77809600 | -1.84598900 | 1.19335900  |
| O | 0.78442700  | -0.41145700 | 2.18279600  |
| H | -1.23645200 | 0.28641400  | 3.79804500  |
| H | -0.10590400 | -1.95980400 | 3.09837600  |
| H | -1.57534400 | -1.42024400 | 0.81479900  |
| H | 0.55092300  | 0.47538900  | 1.80068100  |
| C | 0.61209600  | 3.10677100  | -0.75508600 |

|   |             |             |             |
|---|-------------|-------------|-------------|
| C | 0.85010900  | 2.79867400  | 0.72372100  |
| O | -0.39190600 | 2.77248500  | -1.33733400 |
| O | -0.12719600 | 1.91502000  | 1.20765200  |
| O | 2.14068300  | 2.32340700  | 0.91378700  |
| H | 1.42757400  | 3.65428300  | -1.25996000 |
| H | 0.78969600  | 3.73912000  | 1.28686600  |
| H | -0.72964500 | 1.61587100  | 0.49055500  |
| H | 2.26500800  | 1.55274800  | 0.33343300  |
| S | 1.95267100  | -1.15006000 | -0.82134300 |
| O | 2.90502600  | -1.49401400 | -1.83320700 |
| O | 1.42412500  | 0.21777300  | -0.75468100 |
| O | 2.56106100  | -1.48557300 | 0.59372400  |
| O | 0.72565000  | -2.13161200 | -0.94782600 |
| H | 0.14848300  | -2.08408000 | -0.12614100 |
| H | 1.97711000  | -1.08203200 | 1.30831300  |

(SA)<sub>3</sub>(P3)

|   |             |             |             |
|---|-------------|-------------|-------------|
| S | -3.29849400 | -0.18602700 | 0.27207400  |
| O | -2.52718300 | -0.75535700 | -0.83905400 |
| O | -4.69912500 | -0.43003800 | 0.39812500  |
| O | -3.08595000 | 1.37341400  | 0.24389200  |
| O | -2.58047800 | -0.64203800 | 1.60690000  |
| H | -1.65885700 | -0.92790400 | 1.40772000  |
| H | -2.13933100 | 1.58366900  | 0.07156400  |
| S | 0.55153400  | 2.57547300  | -0.16006400 |
| O | -0.08121900 | 3.85094100  | -0.06392600 |
| O | -0.34101000 | 1.38028600  | -0.16239100 |
| O | 1.59788800  | 2.38446300  | 0.96401100  |
| O | 1.38062200  | 2.53424100  | -1.49920000 |
| H | 2.00774000  | 1.77647700  | -1.49709900 |
| H | 1.83028600  | 1.39550300  | 1.17763100  |
| S | 0.24679100  | -1.91052100 | -0.59415500 |
| O | -0.08583100 | -1.44677500 | 0.76359200  |
| O | 1.49144500  | -2.63555900 | -0.72276400 |

|   |             |             |             |
|---|-------------|-------------|-------------|
| O | 0.26631700  | -0.68524300 | -1.55144400 |
| O | -0.89972900 | -2.81670900 | -1.13948100 |
| H | -1.74038900 | -2.28409900 | -1.13751500 |
| H | -0.06913600 | 0.14714500  | -1.07732100 |
| C | 3.44056600  | -0.56493300 | -0.36640500 |
| C | 3.24339000  | -0.73955000 | 1.14327300  |
| O | 2.94111100  | 0.34373300  | -0.98627400 |
| O | 2.11865300  | 0.00571300  | 1.58895500  |
| O | 3.19118200  | -2.06399700 | 1.51157700  |
| H | 4.10978600  | -1.29603600 | -0.85134300 |
| H | 4.11432300  | -0.29301600 | 1.63895200  |
| H | 1.31175200  | -0.54563900 | 1.52978200  |
| H | 2.63926600  | -2.56857600 | 0.89058300  |

(SA)(P6)

|   |             |             |             |
|---|-------------|-------------|-------------|
| S | -1.22436800 | -0.11408800 | -0.11064300 |
| O | -0.28692800 | -1.16996400 | -0.43042700 |
| O | -2.58844400 | -0.14350200 | -0.55981200 |
| O | -0.61266500 | 1.27054600  | -0.49996500 |
| O | -1.21464100 | -0.06428500 | 1.49951000  |
| H | -1.99309000 | 0.42692300  | 1.80844700  |
| H | 0.40772000  | 1.26555600  | -0.38340600 |
| H | 1.62812500  | -0.16010700 | 1.32174000  |
| C | 2.37426100  | 0.01057700  | 0.53887100  |
| O | 2.53120100  | -1.05911700 | -0.31174200 |
| O | 1.90304200  | 1.17834500  | -0.16057400 |
| H | 3.34901600  | 0.23719700  | 0.97481400  |
| H | 1.64975600  | -1.40232600 | -0.53085400 |
| H | 2.45027700  | 1.29853300  | -0.94959000 |

(SA)(P7)

|   |            |             |             |
|---|------------|-------------|-------------|
| S | 1.46811400 | -0.14045300 | -0.13343600 |
| O | 2.76069000 | -0.76319700 | -0.21067900 |
| O | 0.53520500 | -0.17367800 | -1.24075100 |

|   |             |             |             |
|---|-------------|-------------|-------------|
| O | 1.66856000  | 1.43034300  | 0.16930600  |
| O | 0.75822800  | -0.64611900 | 1.16527500  |
| H | -0.18773600 | -0.24935600 | 1.21857200  |
| H | 2.48520300  | 1.55022400  | 0.68076500  |
| C | -2.41210600 | -1.30223500 | -0.15685300 |
| C | -2.44239300 | 0.18837900  | 0.10263300  |
| O | -1.54106400 | 0.44128500  | 1.20813700  |
| O | -2.09223300 | 0.96896600  | -0.98357400 |
| H | -3.13780500 | -1.54034700 | -0.93673000 |
| H | -2.66772800 | -1.85325800 | 0.75079900  |
| H | -1.41905500 | -1.60821900 | -0.49813200 |
| H | -3.43588800 | 0.52426800  | 0.41329800  |
| H | -1.46657000 | 1.40079500  | 1.31367000  |
| H | -1.24833900 | 0.64548500  | -1.34366000 |

(SA)(H<sub>2</sub>O)<sub>2</sub>

|   |             |             |             |
|---|-------------|-------------|-------------|
| S | -0.00008800 | 0.44147300  | -0.00038300 |
| O | -1.09447800 | 1.15058500  | -0.62761400 |
| O | 1.09482300  | 1.15259600  | 0.62371400  |
| O | 0.58481700  | -0.54056800 | -1.09084200 |
| O | -0.58577300 | -0.53519500 | 1.09461800  |
| H | -1.51518200 | -0.79635500 | 0.82503100  |
| H | 1.51477800  | -0.79986400 | -0.82108600 |
| O | -2.99391200 | -0.77175900 | 0.08548900  |
| H | -2.87221300 | 0.01016200  | -0.47606900 |
| H | -3.33616800 | -1.48145300 | -0.46722500 |
| O | 2.99414300  | -0.77157500 | -0.08504200 |
| H | 3.33965800  | -1.47993100 | 0.46735800  |
| H | 2.87357500  | 0.01120000  | 0.47554400  |

(SA)(NH<sub>3</sub>)(H<sub>2</sub>O)

|   |             |            |             |
|---|-------------|------------|-------------|
| S | 0.01975300  | 0.38832600 | -0.00252000 |
| O | -0.95507300 | 1.18559300 | 0.71472900  |
| O | 1.08656300  | 1.02966400 | -0.75134100 |



|   |             |             |             |
|---|-------------|-------------|-------------|
| O | -0.72916600 | -0.58413400 | -0.96580800 |
| O | 0.68413700  | -0.57669700 | 1.06768800  |
| H | 1.60495000  | -0.81404400 | 0.76474000  |
| H | -1.72652700 | -0.70560900 | -0.63651100 |
| N | -3.12999700 | -0.66090000 | -0.03710300 |
| H | -3.87594100 | -0.50256200 | -0.70752300 |
| H | -3.38148400 | -1.45945100 | 0.53754500  |
| H | -3.05253400 | 0.15899300  | 0.56420000  |
| O | 3.07420000  | -0.76697500 | -0.06367700 |
| H | 2.84083400  | -0.00570000 | -0.62036000 |
| H | 3.89934900  | -0.55815500 | 0.38522000  |

(SA)(P1)(H<sub>2</sub>O)

|   |             |             |             |
|---|-------------|-------------|-------------|
| S | -2.58219900 | -0.12934400 | -0.15093400 |
| O | -1.66757400 | 0.51725300  | -1.07615100 |
| O | -3.79948600 | -0.74692100 | -0.60878500 |
| O | -2.96888700 | 1.04702000  | 0.88121600  |
| O | -1.80727100 | -1.13785100 | 0.73767400  |
| H | -0.77593400 | -0.85497300 | 0.83004000  |
| H | -3.73449800 | 0.76851500  | 1.40847200  |
| C | 1.14932200  | -1.08856600 | -0.37137600 |
| C | 2.64199600  | -1.27532100 | -0.17385600 |
| O | 0.56214200  | -0.49049500 | 0.78779900  |
| C | 3.42174300  | 0.02734900  | -0.15434400 |
| C | 4.83728900  | -0.03557400 | 0.35994400  |
| O | 2.93041700  | 1.07057000  | -0.53956000 |
| H | 0.66567700  | -2.05896300 | -0.51236700 |
| H | 0.94062900  | -0.46874700 | -1.25004300 |
| H | 2.83782200  | -1.82593200 | 0.75372500  |
| H | 3.05671600  | -1.88373900 | -0.98990900 |
| H | 4.80844200  | -0.16236400 | 1.44786800  |
| H | 5.36447900  | -0.90040800 | -0.05335000 |
| H | 5.36527300  | 0.88661300  | 0.11849300  |
| H | -0.36966400 | 1.94284000  | -0.43051000 |

|   |            |            |             |
|---|------------|------------|-------------|
| O | 0.38868700 | 2.01449800 | 0.17110200  |
| H | 1.18178600 | 2.15591200 | -0.36542200 |
| H | 0.56813400 | 0.51084400 | 0.66936600  |

(SA)(P1)(H<sub>2</sub>O)<sub>2</sub>

|   |             |             |             |
|---|-------------|-------------|-------------|
| S | -1.50013100 | 0.81452200  | 0.10886400  |
| O | -0.73940000 | 0.24711300  | 1.21648700  |
| O | -1.58360800 | 2.26320700  | 0.05915400  |
| O | -2.94673900 | 0.23752000  | 0.06787200  |
| O | -0.92613500 | 0.23579800  | -1.23435500 |
| H | 0.10272300  | 0.16730800  | -1.17439000 |
| H | -2.88070400 | -0.77747000 | -0.05668200 |
| C | 0.67955300  | -1.88819700 | 0.87104400  |
| C | 1.95287900  | -1.09352900 | 0.95219400  |
| O | 0.21436900  | -2.29976100 | -0.17546000 |
| C | 2.46650500  | -0.61804100 | -0.40312900 |
| C | 3.86493900  | -0.02770700 | -0.30406500 |
| O | 1.57851000  | 0.34868100  | -0.97009400 |
| H | 0.18045800  | -2.11033800 | 1.82943900  |
| H | 2.70160700  | -1.73010200 | 1.44553800  |
| H | 1.77223300  | -0.24236700 | 1.62127900  |
| H | 2.45577100  | -1.45677100 | -1.10527200 |
| H | 3.87553600  | 0.81431500  | 0.39757800  |
| H | 4.19196400  | 0.32946800  | -1.28320100 |
| H | 4.57848300  | -0.77665600 | 0.05077400  |
| H | 1.63572300  | 1.20540100  | -0.48454000 |
| O | 1.24639900  | 2.72035700  | 0.31129200  |
| H | 1.52501900  | 3.54126100  | -0.10711700 |
| H | 0.27890200  | 2.78189400  | 0.41148000  |
| O | -2.56292100 | -2.26061800 | -0.33427200 |
| H | -2.84683100 | -2.53421600 | -1.21368500 |
| H | -1.59584700 | -2.41760900 | -0.29427200 |

(SA)<sub>2</sub>(P1)(H<sub>2</sub>O)

|   |             |             |             |
|---|-------------|-------------|-------------|
| S | -2.80957300 | -0.29324900 | 0.26107600  |
| O | -1.97946000 | 0.73869500  | -0.35943500 |
| O | -4.15908600 | 0.00286800  | 0.62909100  |
| O | -2.04519600 | -0.80346000 | 1.54613200  |
| O | -2.84019200 | -1.55075000 | -0.68944800 |
| H | -1.92309700 | -1.84172800 | -0.91912500 |
| H | -1.06437400 | -0.82994000 | 1.37736600  |
| S | 0.89043200  | -1.54181300 | -0.37002800 |
| O | -0.22005300 | -2.25094100 | -0.98580700 |
| O | 0.53416100  | -0.77346100 | 0.84055600  |
| O | 1.59738700  | -0.58393100 | -1.35945400 |
| O | 2.00358100  | -2.56252600 | -0.05205500 |
| H | 2.87017600  | -2.05598600 | 0.24089700  |
| H | 1.16232800  | 0.39139500  | -1.34173100 |
| C | 1.88419500  | 1.45725700  | 1.33270500  |
| C | 0.73254800  | 2.34331400  | 0.95553600  |
| O | 2.82800400  | 1.24635400  | 0.59372100  |
| C | 0.71014100  | 2.72515000  | -0.52094200 |
| C | -0.31126400 | 3.81041500  | -0.81641800 |
| O | 0.41384900  | 1.57133000  | -1.32939000 |
| H | 1.85357200  | 1.00665100  | 2.33929800  |
| H | 0.79889500  | 3.24360000  | 1.58331800  |
| H | -0.20175200 | 1.84014500  | 1.23829600  |
| H | 1.71044000  | 3.03447600  | -0.83453400 |
| H | -0.06512400 | 4.72613400  | -0.27201900 |
| H | -1.31224500 | 3.48502200  | -0.51338800 |
| H | -0.32372500 | 4.03235800  | -1.88553100 |
| H | -0.51109800 | 1.29742500  | -1.15617800 |
| O | 4.00808900  | -1.21468700 | 0.60718000  |
| H | 3.73443800  | -0.27146100 | 0.65178800  |
| H | 4.75544100  | -1.26984100 | 0.00076800  |

(SA)(P3)(H<sub>2</sub>O)

|   |            |            |             |
|---|------------|------------|-------------|
| S | 1.41658300 | 0.45535300 | -0.01750000 |
|---|------------|------------|-------------|

|   |             |             |             |
|---|-------------|-------------|-------------|
| O | 0.40161400  | 1.30982400  | 0.57030700  |
| O | 2.62716200  | 1.01964900  | -0.57372600 |
| O | 0.75727600  | -0.40665400 | -1.15590600 |
| O | 1.79442100  | -0.59926700 | 1.09068700  |
| H | 2.69307800  | -0.98722700 | 0.86539200  |
| H | -0.18875400 | -0.64515500 | -0.89945800 |
| C | -3.81069300 | -0.17393700 | 0.40927600  |
| C | -2.31988900 | 0.14918200  | 0.35017100  |
| O | -4.25602800 | -1.15880900 | -0.12504600 |
| O | -1.65855600 | -0.89933800 | -0.32918800 |
| O | -2.23446400 | 1.36619100  | -0.30253700 |
| H | -4.44828500 | 0.56129700  | 0.92717400  |
| H | -1.88345000 | 0.19713300  | 1.35527700  |
| H | -2.32147900 | -1.40923400 | -0.82706700 |
| H | -1.35201000 | 1.73530300  | -0.13229000 |
| O | 4.18534700  | -1.16674300 | 0.21287500  |
| H | 4.21800500  | -0.38252500 | -0.35728900 |
| H | 4.46688300  | -1.92552100 | -0.30815600 |

(SA)(P3)(H<sub>2</sub>O)<sub>2</sub>

|   |             |             |             |
|---|-------------|-------------|-------------|
| S | -0.97745800 | -0.47143200 | -0.02542100 |
| O | -0.17402200 | 0.26853800  | -0.99519700 |
| O | -2.15982200 | -1.15495600 | -0.51798100 |
| O | -0.06930800 | -1.53161600 | 0.67712700  |
| O | -1.35437900 | 0.46121600  | 1.16455500  |
| H | -2.24299000 | 0.98208600  | 0.98043100  |
| H | 0.89522800  | -1.23692200 | 0.64960800  |
| C | 4.27600000  | 0.39986300  | -0.44798200 |
| C | 2.76324300  | 0.20138300  | -0.51122000 |
| O | 4.93820400  | -0.12503500 | 0.41142700  |
| O | 2.38764200  | -0.73781600 | 0.47259300  |
| O | 2.22800200  | 1.46105500  | -0.30725600 |
| H | 4.70931800  | 1.08247600  | -1.19784300 |
| H | 2.45392500  | -0.22118100 | -1.47518600 |

|   |             |             |             |
|---|-------------|-------------|-------------|
| H | 3.06224400  | -0.75099200 | 1.17249800  |
| H | 1.28297800  | 1.41348800  | -0.53297900 |
| O | -4.75970200 | -0.19624800 | -0.70060000 |
| H | -3.96466700 | -0.74714200 | -0.81115300 |
| H | -5.46348200 | -0.76498000 | -0.37379800 |
| O | -3.50379600 | 1.63689000  | 0.70651800  |
| H | -4.11660800 | 1.03595300  | 0.20675300  |
| H | -3.47462000 | 2.48642000  | 0.25413700  |

(SA)(P4)(H<sub>2</sub>O)

|   |             |             |             |
|---|-------------|-------------|-------------|
| S | 1.80965200  | -0.50971600 | 0.13823500  |
| O | 0.74782800  | -1.41420200 | -0.26432300 |
| O | 3.08663200  | -1.02760800 | 0.57666400  |
| O | 1.27869800  | 0.42506900  | 1.28358900  |
| O | 2.03340700  | 0.47263100  | -1.07673400 |
| H | 2.94834400  | 0.87964800  | -0.99321500 |
| H | 0.30492200  | 0.65106000  | 1.11909300  |
| O | 4.50613500  | 1.11358600  | -0.55396600 |
| H | 4.62941300  | 0.36088500  | 0.04550700  |
| H | 4.83243900  | 1.90242700  | -0.10924700 |
| C | -3.47610100 | 0.18513200  | 0.36845500  |
| C | -1.99962000 | -0.21590400 | 0.31029300  |
| O | -4.27009600 | -0.81872400 | -0.16401400 |
| O | -3.61468700 | 1.42233400  | -0.29759000 |
| O | -1.74377700 | -0.48238300 | -1.03180800 |
| O | -1.21612800 | 0.86023300  | 0.79968400  |
| H | -3.79094800 | 0.36320400  | 1.39826300  |
| H | -1.77155300 | -1.07287600 | 0.95088500  |
| H | -3.48794500 | 1.26654300  | -1.24460500 |
| H | -1.56236800 | 1.67645800  | 0.40093300  |
| H | -0.86431500 | -0.89220100 | -1.10308700 |
| H | -3.80219700 | -1.20253000 | -0.92078700 |
